# Supplementary material
Source: MDPI journal article supplement (https://www.mdpi.com/1424-2818/14/12/1124)
Supplement: s1 [file s1]

**Table S1.** A list of fungal species isolated from the Manchurian apricot shoots (*P. mandshurica*) in this study and their known ecological features.

| Family and species                  | Ecological group                       | Distribution | Phytopathogenicity <sup>1</sup> | References    |
|-------------------------------------|----------------------------------------|--------------|---------------------------------|---------------|
| Capnodiaceae                        |                                        |              |                                 |               |
| <i>Tripospermum myrti</i>           | Epiphyte                               | Widespread   | –                               | [83]          |
| Cladosporiaceae                     |                                        |              |                                 |               |
| <i>Cladosporium cladosporioides</i> | Saprotroph, endophyte,                 | Ubiquitous   | +/-                             | [38,64]       |
| <i>Cladosporium herbarum</i>        | Saprotroph, endophyte, epiphyte        | Ubiquitous   | +                               | [38]          |
| Diaporthaceae                       |                                        |              |                                 |               |
| <i>Diaporthe eres</i>               | Pathogen, endophyte, saprotroph        | Widespread   | +                               | [46]          |
| Didymellaceae                       |                                        |              |                                 |               |
| <i>Epicoccum nigrum</i>             | Saprotroph, endophyte                  | Widespread   | +                               | [75,76,79]    |
| <i>Nothophoma quercina</i>          | Saprotroph                             | Widespread   | +                               | [73,74]       |
| Dothioraceae                        |                                        |              |                                 |               |
| <i>Aureobasidium pullulans</i>      | Saprotroph, endophyte, epiphyte        | Ubiquitous   | +/-                             | [63,86,89,91] |
| Hypocreaceae                        |                                        |              |                                 |               |
| <i>Gliocladium</i> sp.              |                                        |              |                                 |               |
| Nectriaceae                         |                                        |              |                                 |               |
| <i>Fusarium graminearum</i>         | Cereal pathogen, saprotroph, endophyte | Widespread   | +                               | [71,72]       |
| <i>Fusarium oxysporum</i>           | Saprotroph, endophyte                  | Ubiquitous   | +                               | [69,70,90]    |
| Pleosporaceae                       |                                        |              |                                 |               |
| <i>Alternaria alternata</i>         | Saprotroph, endophyte                  | Ubiquitous   | +                               | [39,63,68]    |
| <i>Alternaria tenuissima</i>        | Saprotroph, endophyte                  | Ubiquitous   | +                               | [39,63,68]    |
| Sarocladiaceae                      |                                        |              |                                 |               |
| <i>Sarocladium strictum</i>         | Saprotroph, endophyte                  | Widespread   | +                               | [22,63,77,78] |

Note. <sup>1</sup>Plant pathogen according to literature data: “–” – no reports, “+” – reported as a pathogen, “+/-” – controversial reports.

## References

- 22 Aghdam, S.A.; Fotouhifar, K.B. New reports of endophytic fungi associated with cherry (*Prunus avium*) and sour cherry (*Prunus cerasus*) trees in Iran. *Mycol. Iran.* **2016**, *3*, 75–85. <https://doi.org/10.22043/MI.2017.112557>.
- 38 Bensch, K.; Braun, U.; Groenewald, J.Z.; Crous, P.W. The genus *Cladosporium*. *Stud. Mycol.* **2012**, *72*, 1–401. <https://doi.org/10.3114/sim0003>.
- 39 Lawrence, D.P.; Rotondo, F.; Gannibal, P.B. Biodiversity and taxonomy of the pleomorphic genus *Alternaria*. *Mycol. Prog.* **2016**, *15*, 3. <https://doi.org/10.1007/s11557-015-1144-x>.
- 46 Udayanga, D.; Castlebury, L.A.; Rossman, A.Y.; Chukeatirote, E.; Hyde, K.D. Insights into the genus *Diaporthe*: Phylogenetic species delimitation in the *D. eres* species complex. *Fungal Div.* **2014**, *67*, 203–229. <https://doi.org/10.1007/s13225-014-0297-2>.
- 63 Sanz-Ros, A.V.; Muller, M.M.; San Martin, R.; Diez, J.J. Fungal endophytic communities on twigs of fast and slow growing Scots pine (*Pinus sylvestris* L.) in northern Spain. *Fung. Biol.* **2015**, *119*, 870–883. <https://doi.org/10.1016/j.funbio.2015.06.008>.
- 64 Rashmi, M.; Kushveer, J.S.; Sarma, V.V. A worldwide list of endophytic fungi with notes on ecology and diversity. *Mycosphere* **2019**, *10*, 798–1079. <https://doi.org/10.5943/mycosphere/10/1/19>.
- 68 Thomma, B.P.H.J. *Alternaria* spp.: From general saprophyte to specific parasite. *Mol. Plant Pathol.* **2003**, *4*, 225–236. <https://doi.org/10.1016/J.1364-3703.2003.00173.X>.

- 69 Smith, S.N. An overview of ecological and habitat aspects in the genus *Fusarium* with special emphasis on the soil-borne pathogenic forms. *Plant Pathol. Bull.***2007**, *16*, 97–120.
- 70 Goswami, R.S.; Kistler, H.C. Heading for disaster: *Fusarium graminearum* on cereal crops. *Mol. Plant Pathol.***2004**, *5*, 515–525. <https://doi.org/10.1111/J.1364-3703.2004.00252.X>.
- 71 Goswami, R.S.; Kistler, H.C. Heading for disaster: *Fusarium graminearum* on cereal crops. *Mol. Plant Pathol.***2004**, *5*, 515–525. <https://doi.org/10.1111/J.1364-3703.2004.00252.X>.
- 72 Lofgren, L.A.; LeBlanc, N.R.; Certano, A.K.; Nachtigall, J.; LaBine, K.M.; Riddle, J.; Broz, K.; Dong, Y.; Bethan, B.; Kafer, C.W.; et al. *Fusarium graminearum*: Pathogen or endophyte of North American grasses? *New Phytol.***2018**, *217*, 1203–1212. <https://doi.org/10.1111/nph.14894>.
- 73 Chethana, K.W.T.; Jayawardene, R.S.; Zhang, W.; Zhou, Y.Y.; Liu, M.; Hyde, K.D.; Li, X.H.; Wang, J.; Zhang, K.C.; Yan, J.Y. Molecular characterization and pathogenicity of fungal taxa associated with cherry leaf spot disease. *Mycosphere***2019**, *10*, 490–530. <https://doi.org/10.5943/mycosphere/10/1/8>.
- 74 Vettraino, A.M.; Li, H.-M.; Eschen, R.; Morales-Rodriguez, C.; Vannini, A. The sentinel tree nursery as an early warning system for pathway risk assessment: Fungal pathogens associated with Chinese woody plants commonly shipped to Europe. *PLoS ONE***2017**, *12*, e0188800. <https://doi.org/10.1371/journal.pone.0188800>.
- 75 Mahadevakumar, S.; Jayaramaiah, K.M.; Janardhana, G.R. First report of leaf spot disease caused by *Epicoccum nigrum* on *Lablab purpureus* in India. *Plant Dis.***2014**, *98*, 284–284. <https://doi.org/10.1094/PDIS-07-13-0798-PDN>.
- 76 Wu, D.; Zhang, D.H.; Timko, M.P.; Li, M.Y.; Liang, G.L. First report of *Epicoccum nigrum* causing brown leaf spot of Loquat in southwestern China. *Plant Dis.***2017**, *101*, 1553–1553. <https://doi.org/10.1094/PDIS-12-16-1840-PDN>.
- 77 Summerbell, R.C.; Gueidan, C.; Schroers, H.J.; de Hoog, G.S.; Starink, M.; Rosete, Y.A.; Guarro, J.; Scott, J.A. *Acremonium* phylogenetic overview and revision of *Gliomastix*, *Sarocladium*, and *Trichothecium*. *Stud. Mycol.* **2011**, *68*, 139–162. <https://doi.org/10.3114/sim.2011.68.06>.
- 78 Racedo, J.; Salazar, S.M.; Castagnaro, A.P.; Diaz Ricci, J.C. A strawberry disease caused by *Acremonium strictum*. *Eur. J. Plant Pathol.* **2013**, *137*, 649–654. <https://doi.org/10.1007/s10658-013-0279-3>.
- 79 Favaro, L.C.deL.; de Melo, F.L.; Aguilar-Vildoso, C.I.; Araujo, W.L. Polyphasic analysis of intraspecific diversity in *Epicoccum nigrum* warrants reclassification into separate species. *PLoS ONE***2011**, *6*, e14828. <https://doi.org/10.1371/journal.pone.0014828>.
- 83 Revay, A.; Gonczol, J. Canopy fungi (“terrestrial aquatic hyphomycetes”) from twigs of living evergreen and deciduous trees in Hungary. *Nova Hedwig.* **2011**, *92*, 303–316. <https://doi.org/10.1127/0029-5035/2011/0092-0303>.
- 86 Schena, L.; Nigro, F.; Pentimone, I.; Ligorio, A.; Ippolito, A. Control of postharvest rots of sweet cherries and table grapes with endophytic isolates of *Aureobasidium pullulans*. *Postharv. Biol. Technol.***2003**, *30*, 209–220. [https://doi.org/10.1016/S0925-5214\(03\)00111-X](https://doi.org/10.1016/S0925-5214(03)00111-X).
- 89 Martini, M.; Musetti, R.; Grisan, S.; Polizzotto, R.; Borselli, S.; Pavan, F.; Osler, R. DNA-dependent detection of the grapevine fungal endophytes *Aureobasidium pullulans* and *Epicoccum nigrum*. *Plant Dis.***2009**, *93*, 993–998. <https://doi.org/10.1094/PDIS-93-10-0993>.
- 90 Alabouvette, C.; Olivain, C.; L-Haridon, F.; Aime, S.; Steinberg, C. Using strains of *Fusarium oxysporum* to control fusarium wilts: Dream or reality? In *Novel Biotechnologies for Biocontrol Agent Enhancement and Management. NATO Security through Science Series*; Vurro, M., Gressel, J., Eds.; Springer: Dordrecht, The Netherlands, 2007; pp. 157–177. [https://doi.org/10.1007/978-1-4020-5799-1\\_8](https://doi.org/10.1007/978-1-4020-5799-1_8).
- 91 Sanchez, C.; Graca Barreiro, M.; Ferreira-Pinto, M.M. Characterization of *Aureobasidium pullulans*, a promising biocontrol agent for postharvest diseases. *ISHS Acta Hort.***2012**, *934*, 335–342. <https://doi.org/10.17660/ActaHortic.2012.934.42>.
