# Supplementary material
Source: MDPI journal article supplement (https://www.mdpi.com/1424-2818/14/12/1124)
Supplement: s1 [file s1]

Archive with 2 entries (2 files):
- Morphological Characterization of Fungi.pdf
- Table S1.pdf
